# Supplementary material for: Acetoacetate Based Thermosets Prepared by Dual-Michael Addition Reactions
Source: MDPI journal article supplement (doi:10.3390/polym11091408), 2019-08-27
Supplement: s1 [file s1]

## Supporting information

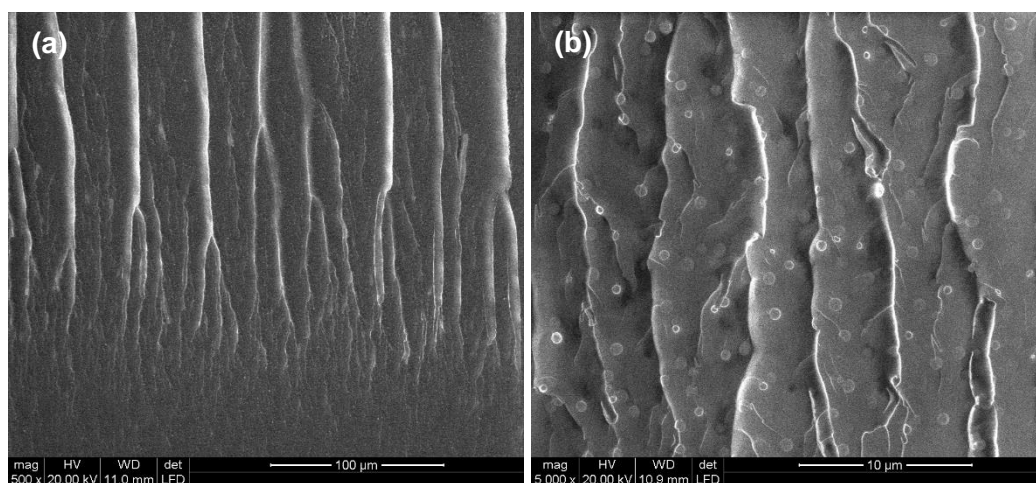

**Figure S1.** SEM images of *DVS-HDDA* 7-1 final material. At a scale of 100 microns, the sample appears homogeneous **(a)**. When magnified, the phase rich in KF-HDDA is observed as covalently bound spheres within the continuous KF-DVS network **(b)**.
